# Supplementary material
Source: HighWire-hosted journal article supplement (https://emboj.embopress.org/content/33/4/385/F6)

**6A****WT**

| time (hrs)    | 0 | ¼ | ½ | 1 | 2 | 0    | ¼ | ½ | 1 | 2 | 0       | ¼ | ½ | 1 | 2 |
|---------------|---|---|---|---|---|------|---|---|---|---|---------|---|---|---|---|
| +/- inhibitor | - |   |   |   |   | EMI1 |   |   |   |   | SECURIN |   |   |   |   |

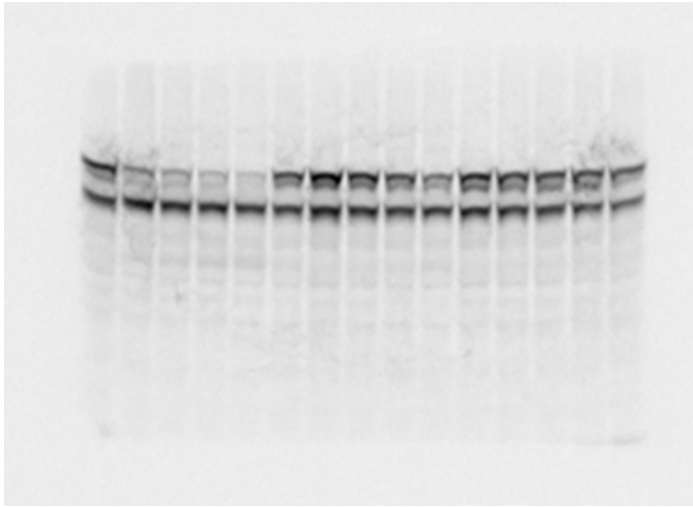**S6A**

| time (hrs)    | 0 | ¼ | ½ | 1 | 2 | 0    | ¼ | ½ | 1 | 2 | 0       | ¼ | ½ | 1 | 2 |
|---------------|---|---|---|---|---|------|---|---|---|---|---------|---|---|---|---|
| +/- inhibitor | - |   |   |   |   | EMI1 |   |   |   |   | SECURIN |   |   |   |   |

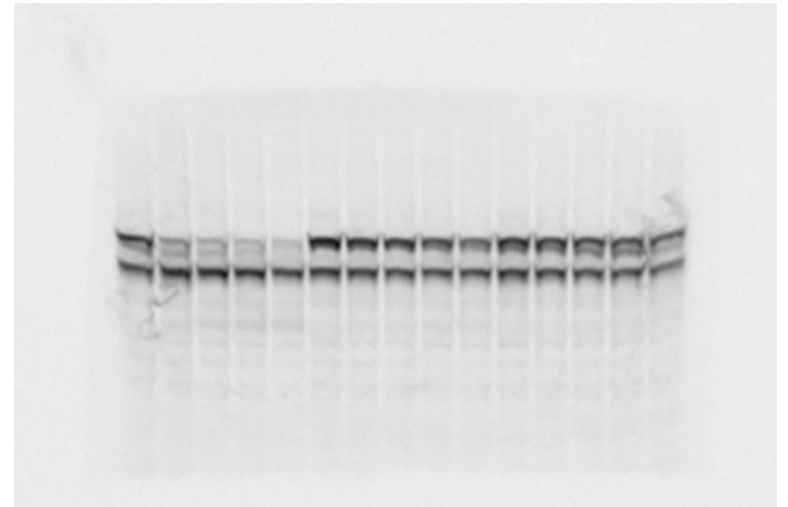**DM**

| time (hrs)    | 0 | ¼ | ½ | 1 | 2 | 0    | ¼ | ½ | 1 | 2 | 0       | ¼ | ½ | 1 | 2 |
|---------------|---|---|---|---|---|------|---|---|---|---|---------|---|---|---|---|
| +/- inhibitor | - |   |   |   |   | EMI1 |   |   |   |   | SECURIN |   |   |   |   |

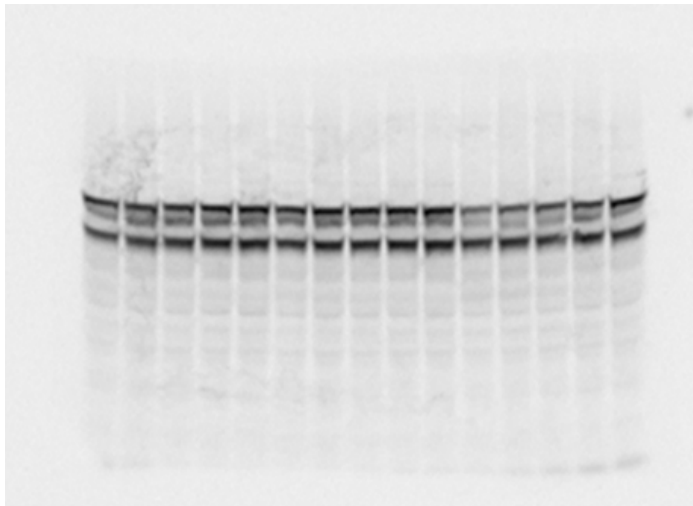**S6D**

| time (hrs)    | 0 | ¼ | ½ | 1 | 2 | 0    | ¼ | ½ | 1 | 2 | 0       | ¼ | ½ | 1 | 2 |
|---------------|---|---|---|---|---|------|---|---|---|---|---------|---|---|---|---|
| +/- inhibitor | - |   |   |   |   | EMI1 |   |   |   |   | SECURIN |   |   |   |   |

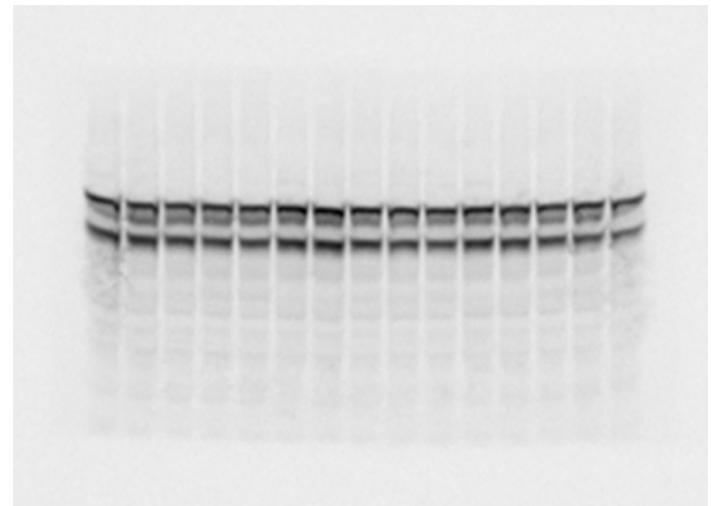

**6A****S26D**

|               |   |   |   |   |   |      |   |   |   |   |         |   |   |   |   |
|---------------|---|---|---|---|---|------|---|---|---|---|---------|---|---|---|---|
| time (hrs)    | 0 | ¼ | ½ | 1 | 2 | 0    | ¼ | ½ | 1 | 2 | 0       | ¼ | ½ | 1 | 2 |
| +/- inhibitor | - |   |   |   |   | EMI1 |   |   |   |   | SECURIN |   |   |   |   |

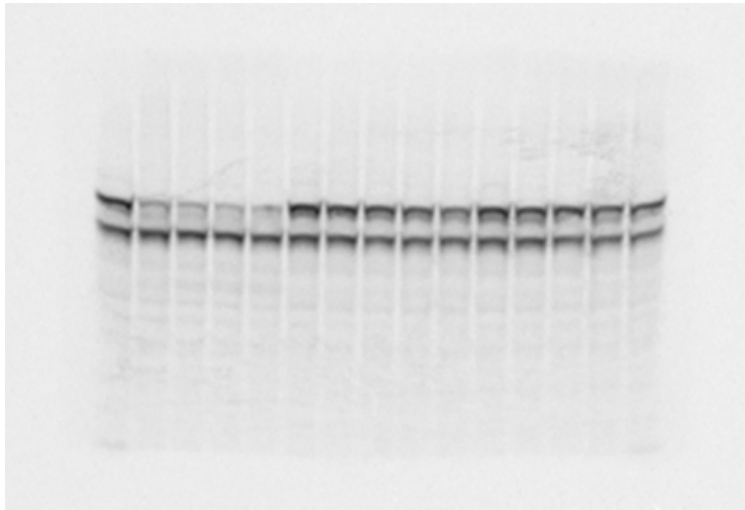**S31D**

|               |   |   |   |   |   |      |   |   |   |   |         |   |   |   |   |
|---------------|---|---|---|---|---|------|---|---|---|---|---------|---|---|---|---|
| time (hrs)    | 0 | ¼ | ½ | 1 | 2 | 0    | ¼ | ½ | 1 | 2 | 0       | ¼ | ½ | 1 | 2 |
| +/- inhibitor | - |   |   |   |   | EMI1 |   |   |   |   | SECURIN |   |   |   |   |

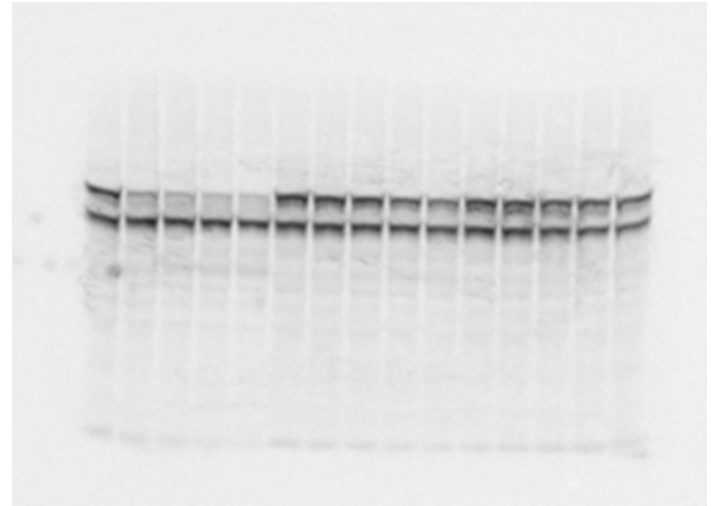**S26A**

|               |   |   |   |   |   |      |   |   |   |   |         |   |   |   |   |
|---------------|---|---|---|---|---|------|---|---|---|---|---------|---|---|---|---|
| time (hrs)    | 0 | ¼ | ½ | 1 | 2 | 0    | ¼ | ½ | 1 | 2 | 0       | ¼ | ½ | 1 | 2 |
| +/- inhibitor | - |   |   |   |   | EMI1 |   |   |   |   | SECURIN |   |   |   |   |

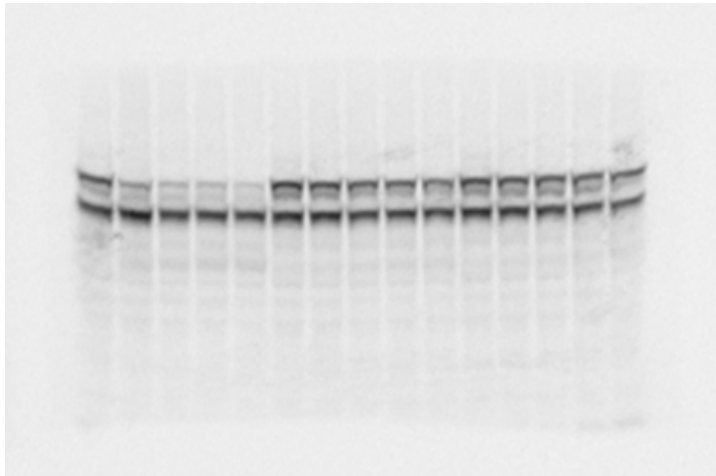**S31A**

|               |   |   |   |   |   |      |   |   |   |   |         |   |   |   |   |
|---------------|---|---|---|---|---|------|---|---|---|---|---------|---|---|---|---|
| time (hrs)    | 0 | ¼ | ½ | 1 | 2 | 0    | ¼ | ½ | 1 | 2 | 0       | ¼ | ½ | 1 | 2 |
| +/- inhibitor | - |   |   |   |   | EMI1 |   |   |   |   | SECURIN |   |   |   |   |

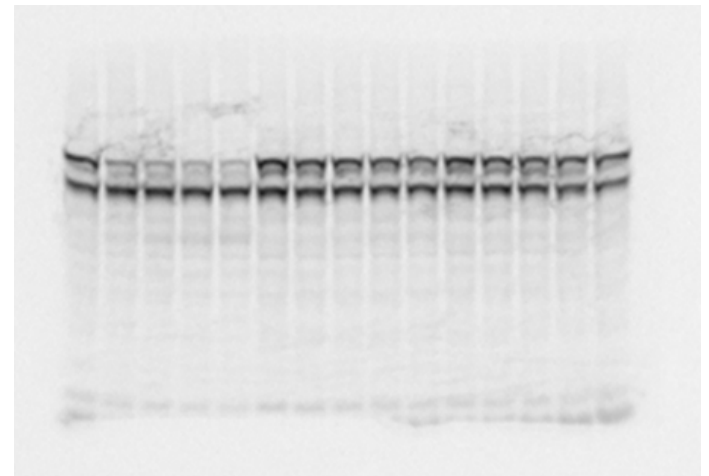

Supplement: inline-supplementary-material-2 [file inline-supplementary-material-2.pdf]
